# Supplementary material
Source: ML conference proceedings conference paper supplement (https://proceedings.neurips.cc/paper_files/paper/2020/hash/93d9033636450402d67cd55e60b3f926-Abstract.html)

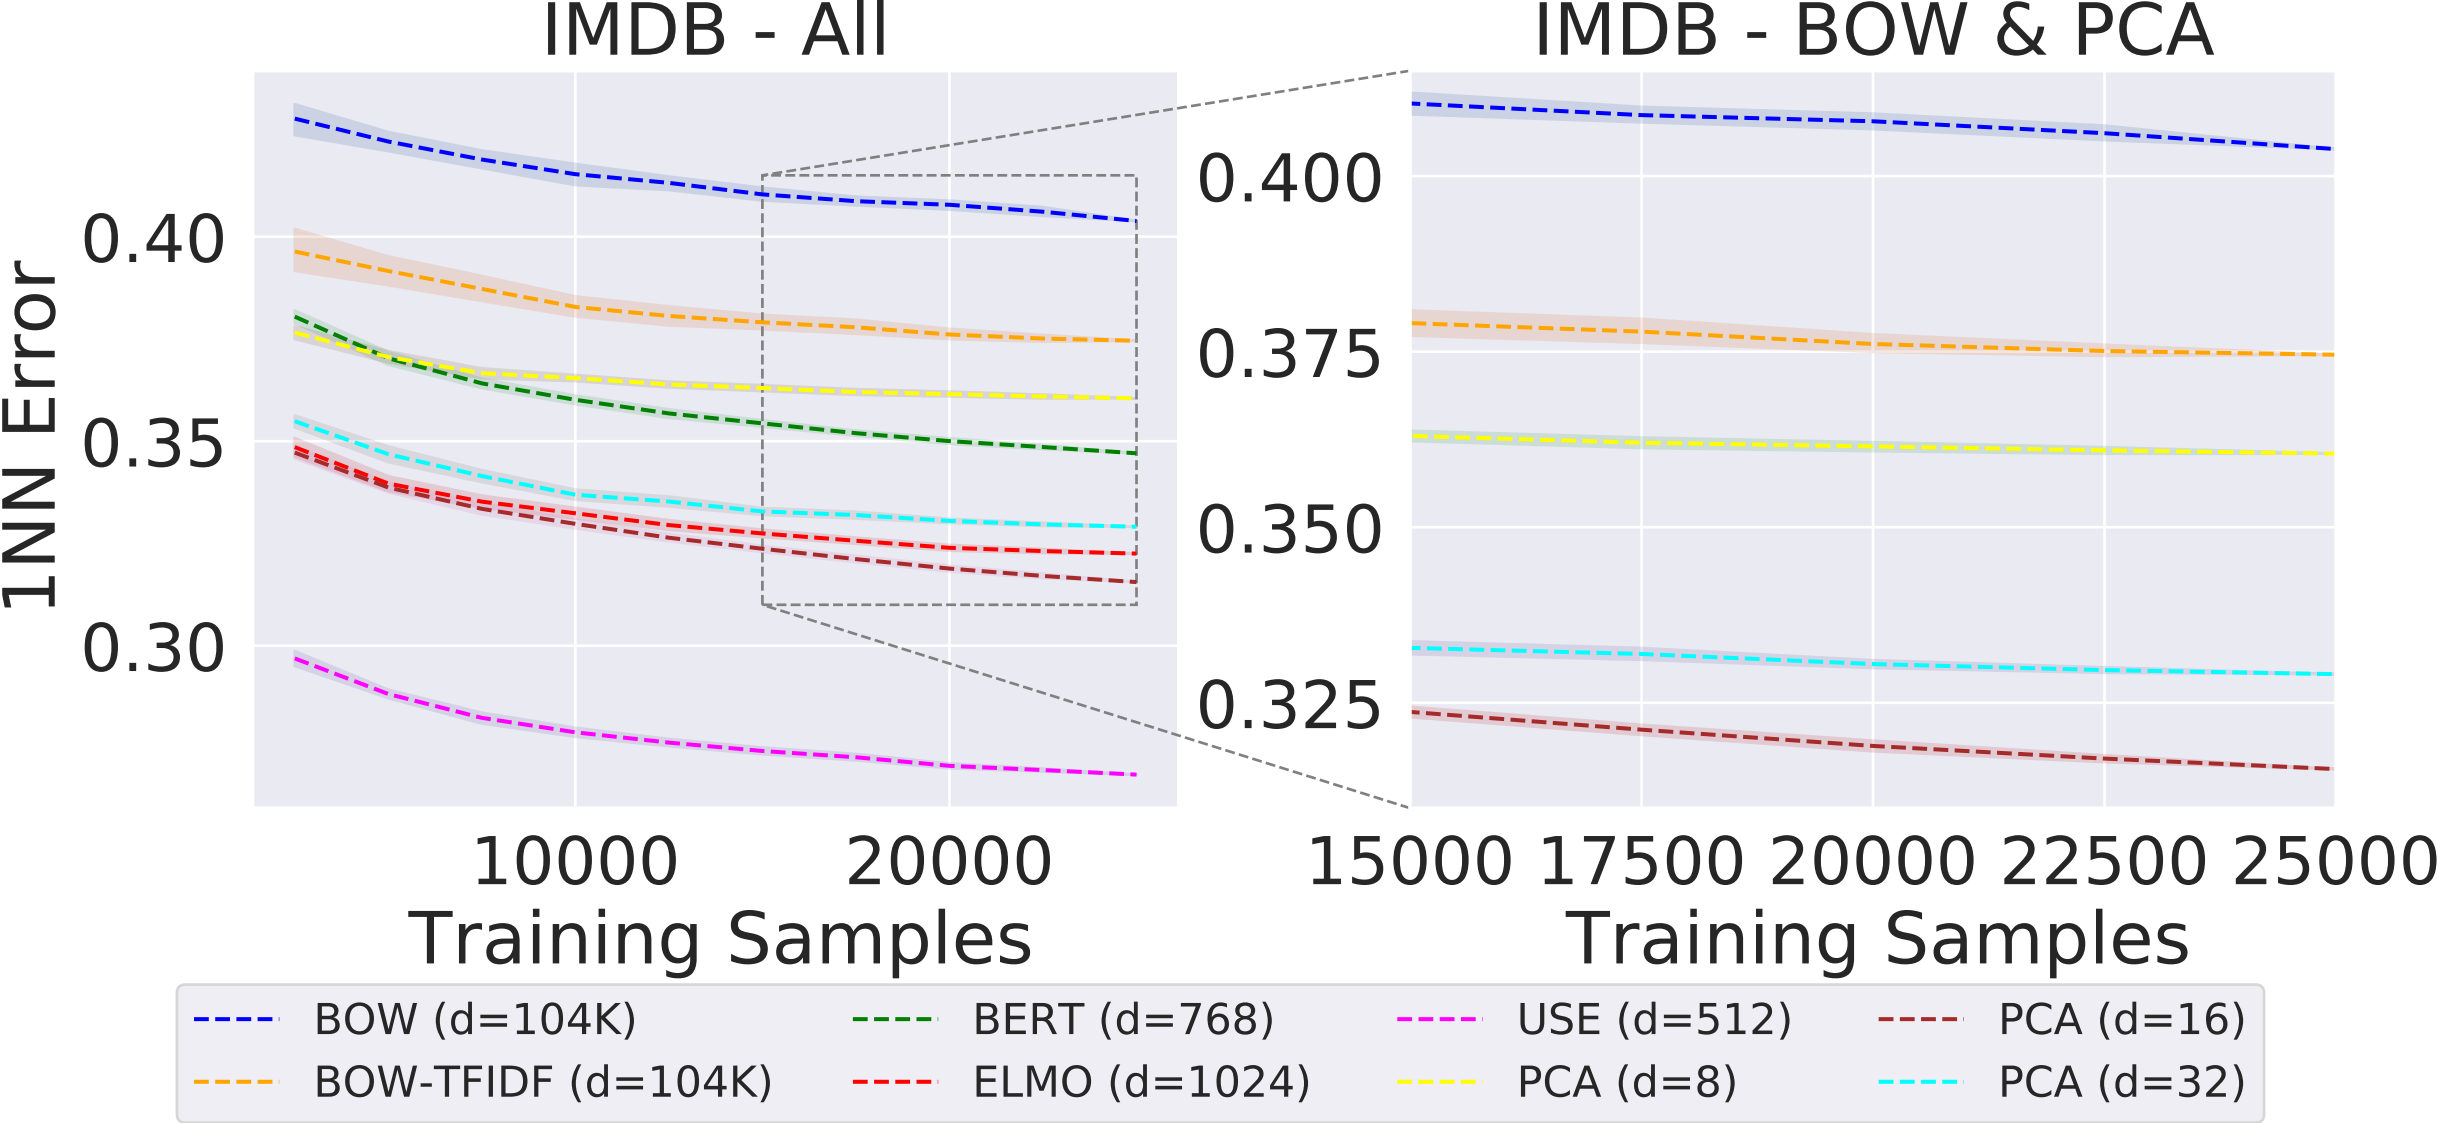

Supplement: Supplementary file [file 93d9033636450402d67cd55e60b3f926-Supplemental.zip]
